# Supplementary material for: Side-chain engineering in naphthalenediimide-based n-type polymers for high-performance all-polymer photodetectors
Source: Royal Society of Chemistry journal article supplement (doi:10.1039/c7py01980g), 2017-12-08

## Supporting Information

### **Side-Chain Engineering in Naphthalenediimide-Based n-Type Polymers for High-Performance All-Polymer Photodetectors**

Liuyong Hu,<sup>a,b</sup> Jinfeng Han,<sup>a,b</sup> Wenqiang Qiao,<sup>\*,a</sup> Xiaokang Zhou,<sup>a,b</sup> Canglong Wang,<sup>c</sup>  
Dongge Ma,<sup>a</sup> Yuning Li,<sup>d</sup> and Zhi Yuan Wang<sup>\*, a,e</sup>

<sup>a</sup> State Key Laboratory of Polymer Physics and Chemistry, Changchun Institute of Applied Chemistry, Chinese Academy of Sciences, Changchun 130022, P. R. China

<sup>b</sup> University of Chinese Academy of Sciences, Beijing 100049, P. R. China

<sup>c</sup> Institute of Modern Physics, Chinese Academy of Science, Lanzhou 730000, P. R. China

<sup>d</sup> Department of Chemical Engineering and Waterloo Institute for Nanotechnology, University of Waterloo, 200 University Avenue West, Waterloo, Ontario, Canada N2L 3G1

<sup>e</sup> Department of Chemistry, Carleton University, 1125 Colonel By Drive, Ottawa, Ontario, Canada K1S 5B6

\*E-mail: wayne\_wang@carleton.ca (Z. Y. W.)

\*E-mail: wqqiao@ciac.ac.cn (W. Q.)

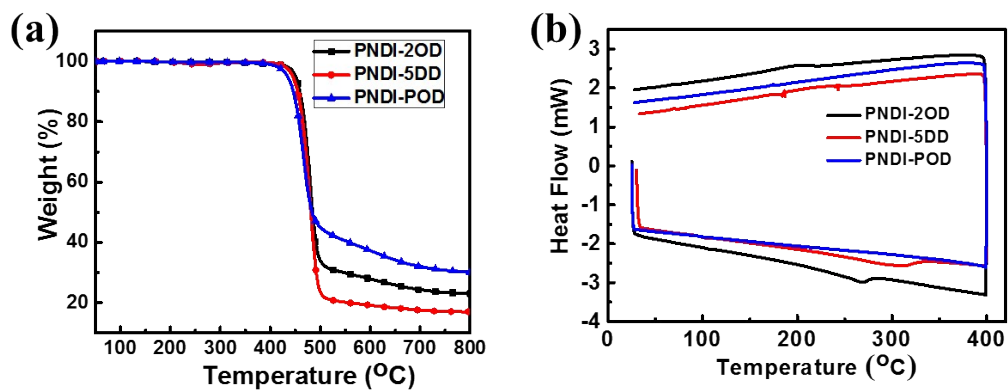

**Figure S1.** (a) TGA thermograms of polymers under nitrogen flow; (b) The second heating and cooling DSC scans of polymers under nitrogen flow.

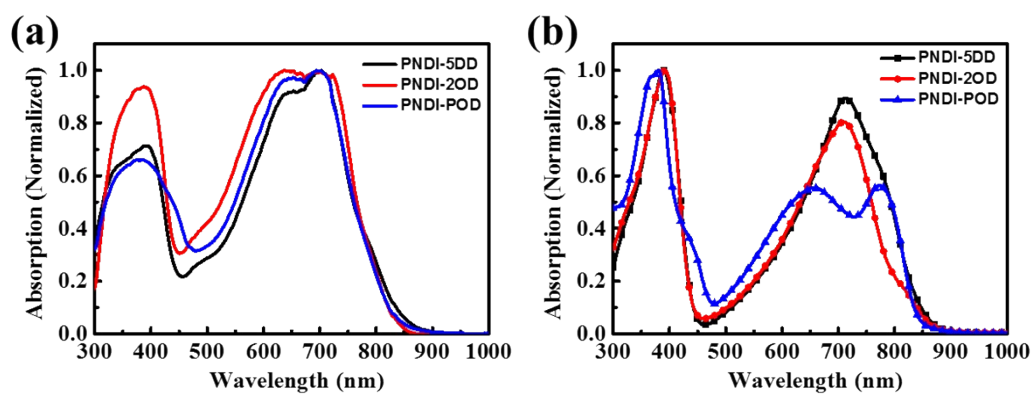

**Figure S2.** (a) The absorption of the blend films of polymers:PTB7-Th; (b) The absorption of the polymers in dilute chloroform solution (0.03 g/L).

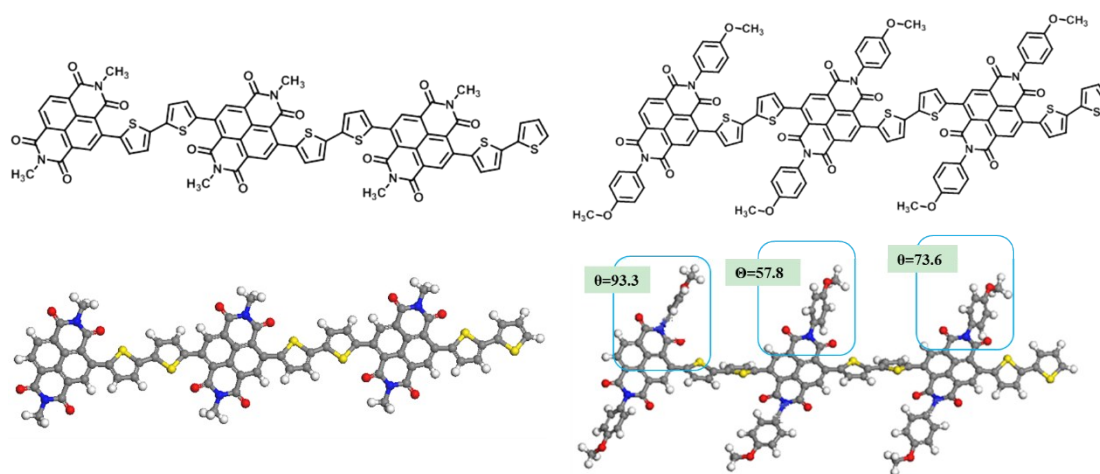

**Figure S3.** The optimized molecular configuration by DFT methods.

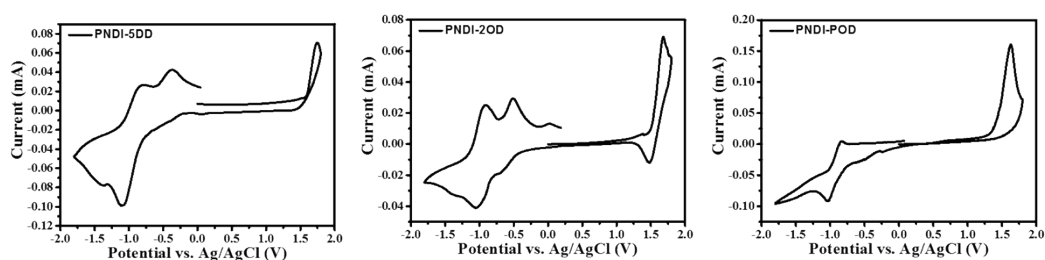

**Figure S4.** Cyclic voltammograms of polymer films on Pt electrode in 0.1 M  $n\text{-Bu}_4\text{NPF}_6$  solution in dry acetonitrile with a scan rate of 50 mV/s.

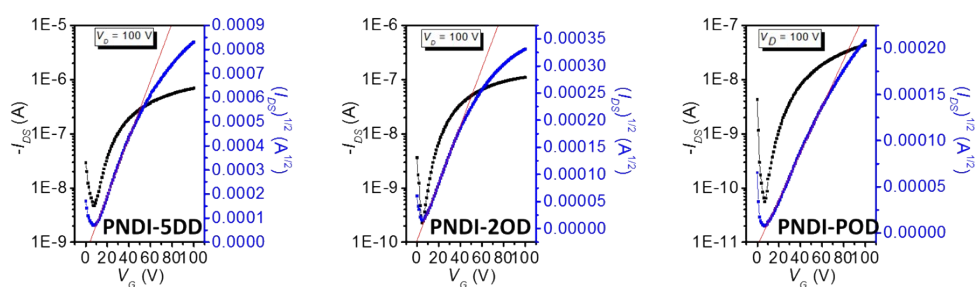

**Figure S5.** Transfer curves of the polymers in BGTC OFETs.

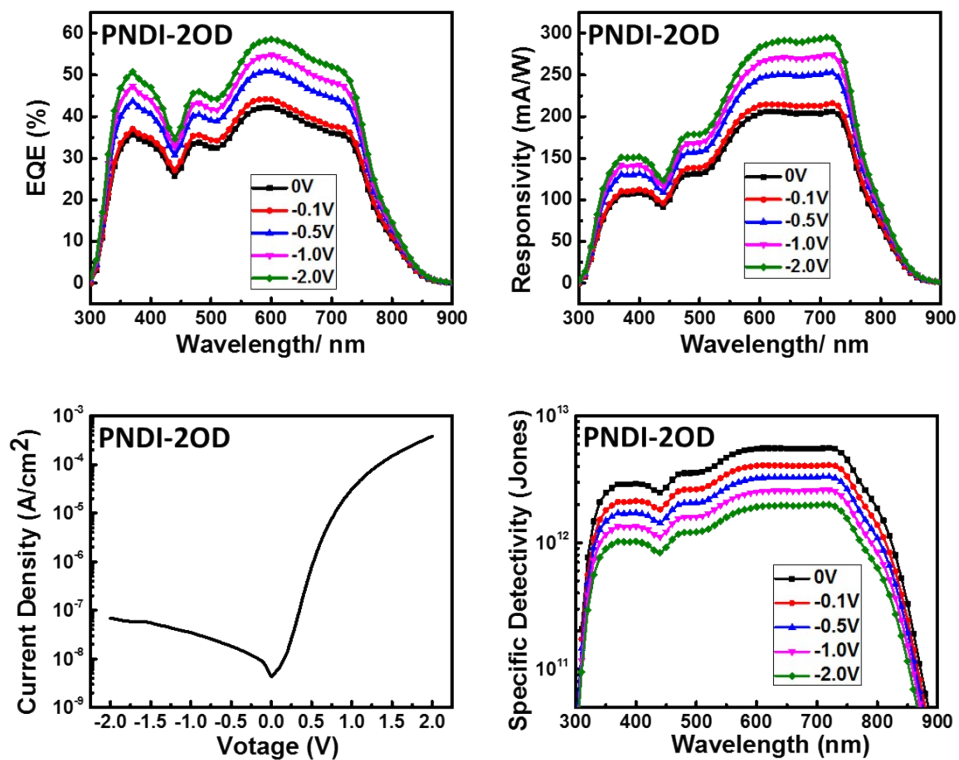

**Figure S6.** The device parameters of PNDI-2OD based photodetectors.

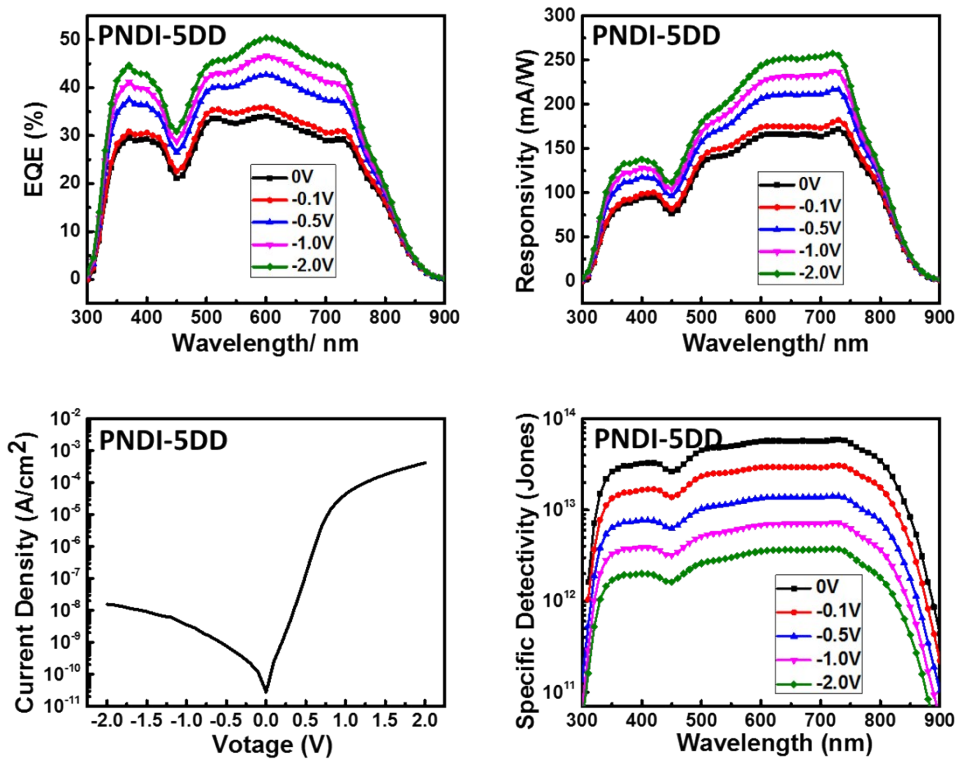

Figure S7. The device parameters of PNDI-5DD based photodetectors.

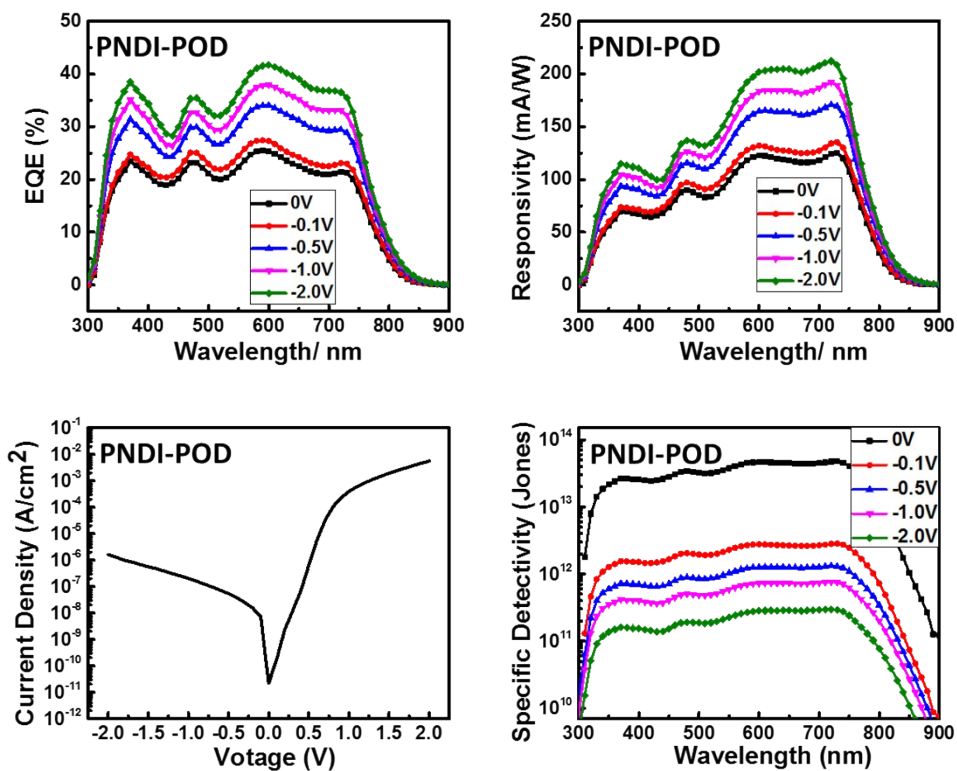

Figure S8. The device parameters of PNDI-POD based photodetectors.

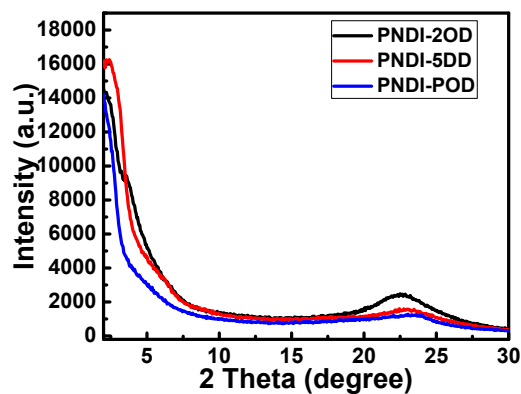

**Figure S9.** The out-of-plane GIXRD of the polymers by spin-coated blend films.

**Table S1.** The electrical parameters of the polymers.

| Polymer  | $\mu_e$ ( $\text{cm}^2\text{V}^{-1}\text{s}^{-1}$ ) | $V_{\text{th}}$ (V) | $I_{\text{on}}/I_{\text{off}}$ |
|----------|-----------------------------------------------------|---------------------|--------------------------------|
| PNDI-5DD | $9.6 \times 10^{-4}$                                | 5                   | $10^2$                         |
| PNDI-2OD | $1.9 \times 10^{-4}$                                | 0.5                 | $10^2$                         |
| PNDI-POD | $4.2 \times 10^{-5}$                                | 2                   | $10^3$                         |

$^1\text{H}$  NMR,  $^{13}\text{C}$  NMR spectrum and MS of compound **2a**.

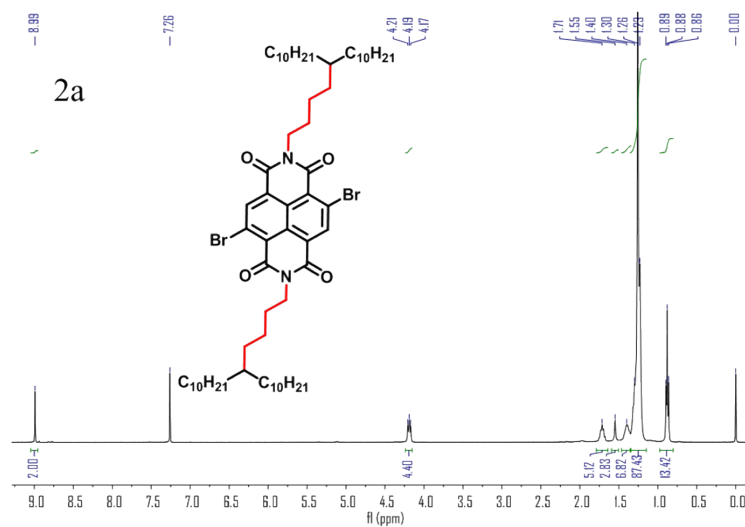

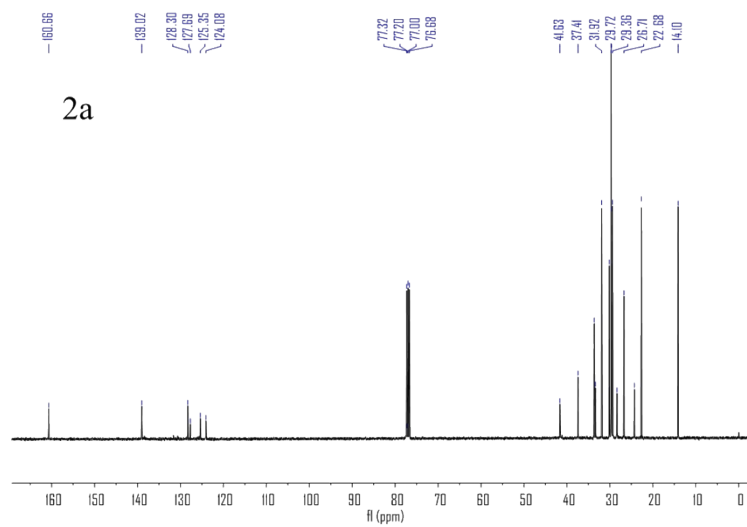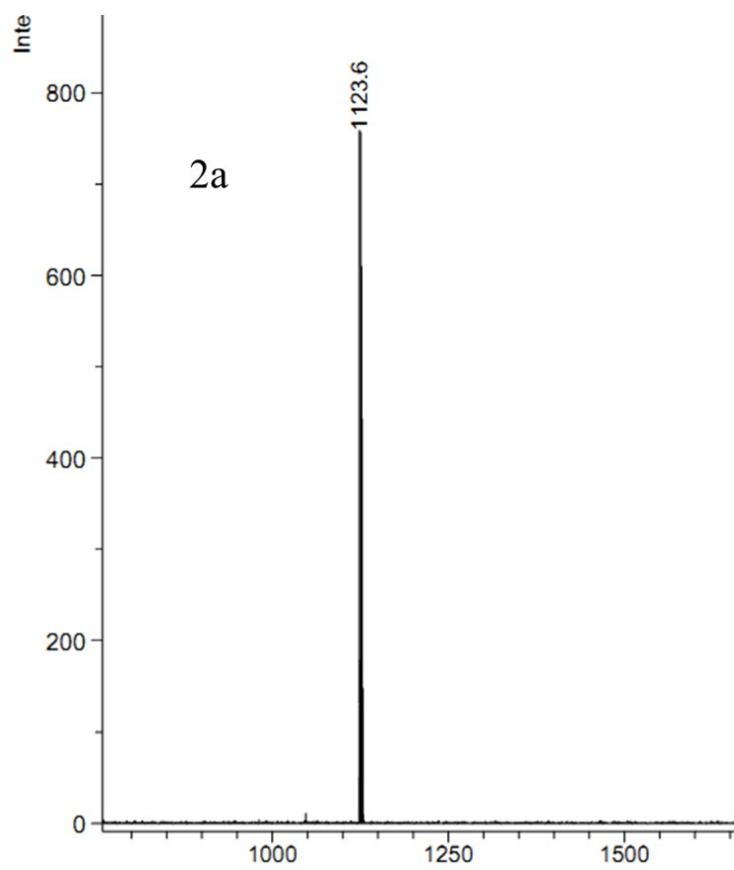

$^1\text{H}$  NMR,  $^{13}\text{C}$  NMR spectrum and MS of compound **2b**.

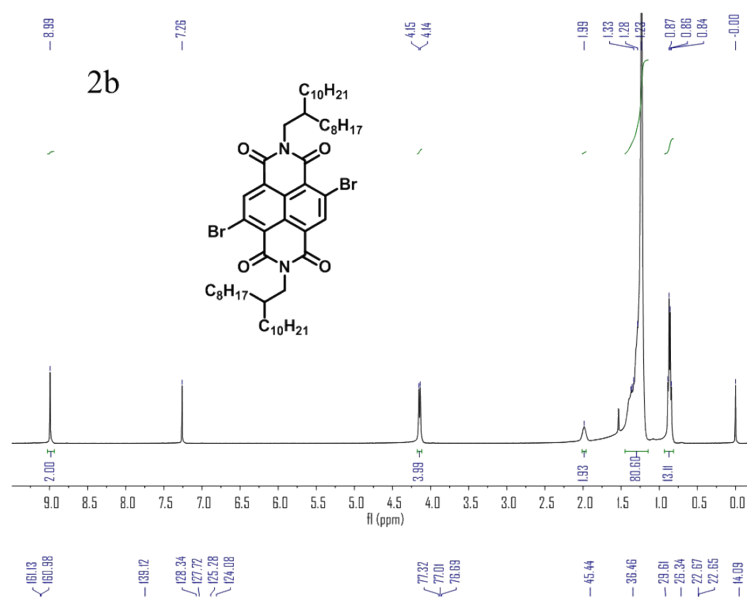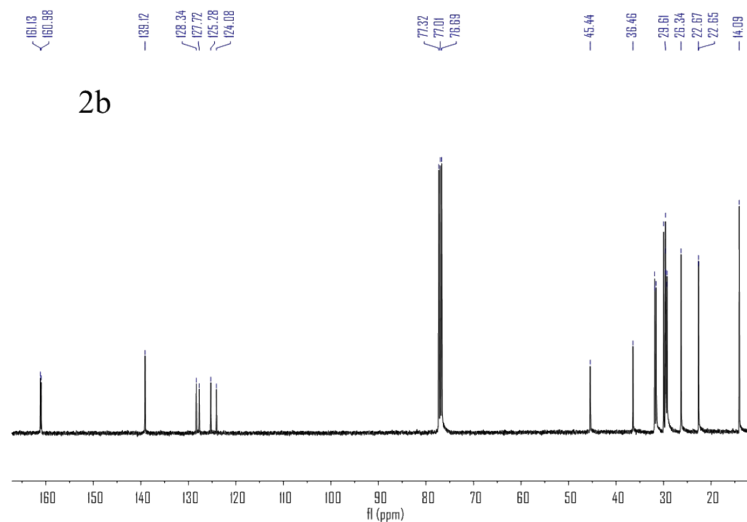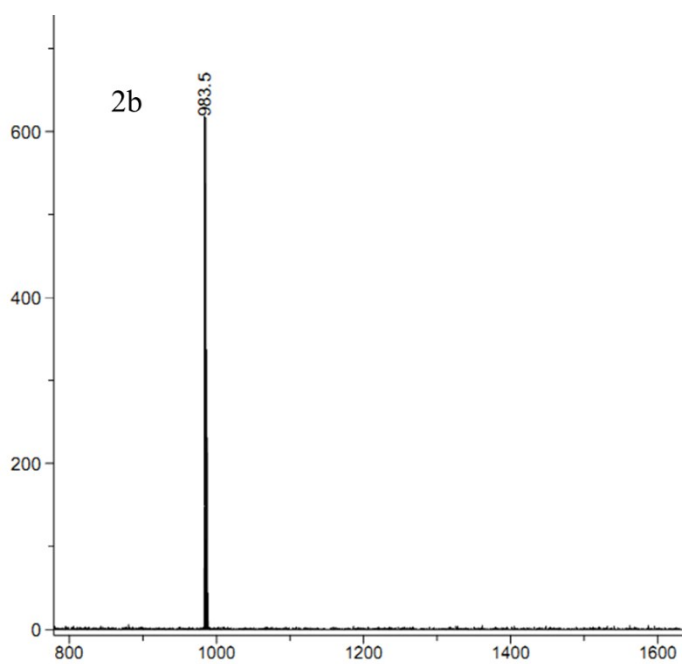

$^1\text{H}$  NMR,  $^{13}\text{C}$  NMR spectrum and MS of compound **2c**.

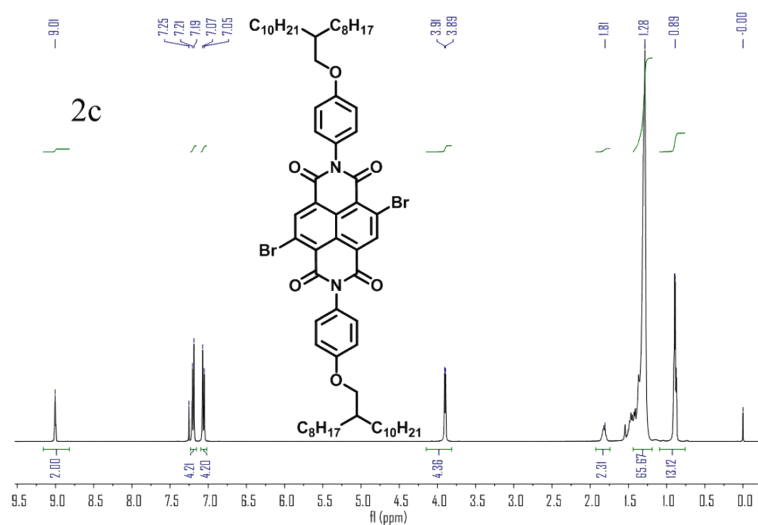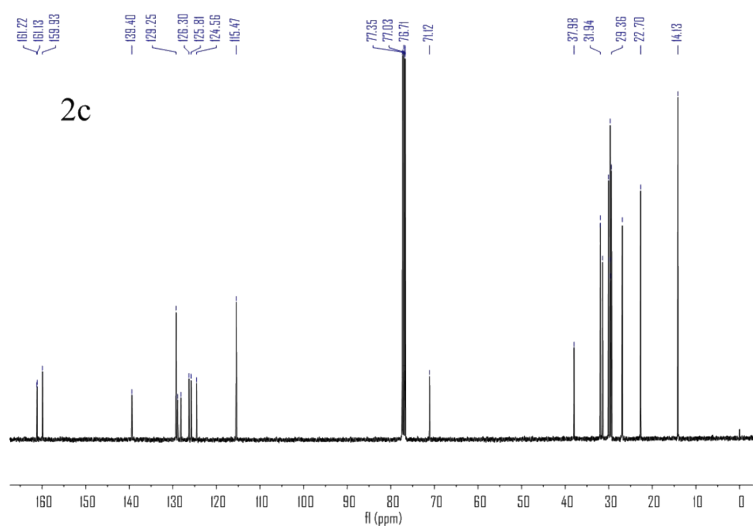

**2c**

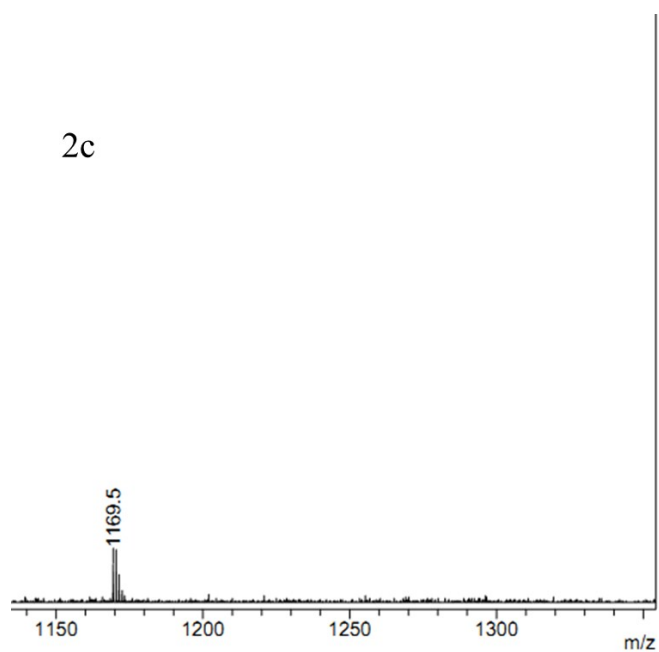



$^1\text{H}$  NMR spectrum of compound Polymers.

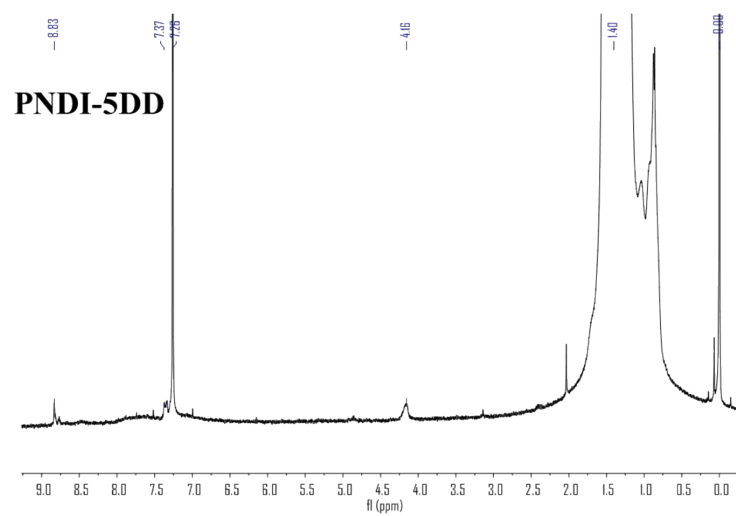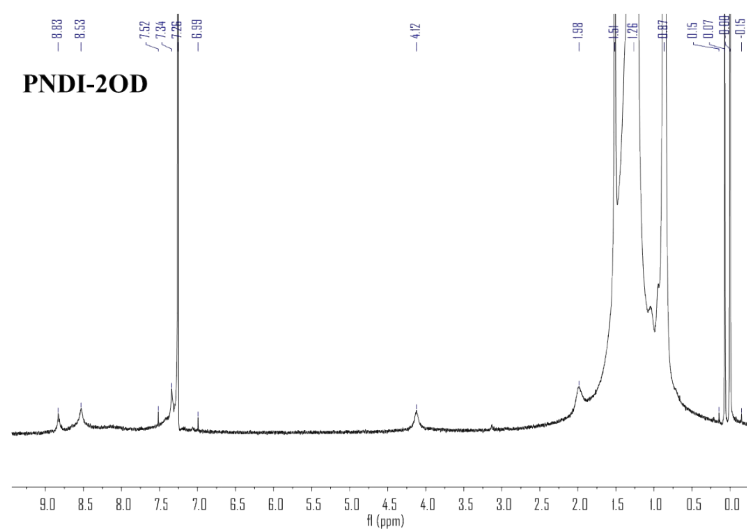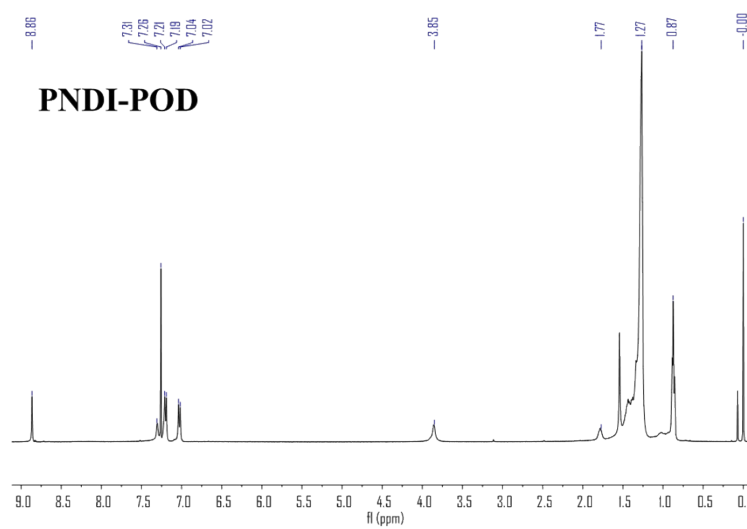

Supplement: c7py01980g1.pdf [file c7py01980g1.pdf]
